# Supplementary material
Source: MDPI journal article supplement (https://www.mdpi.com/2075-5309/6/1/7)
Supplement: s1 [file s1]

### APPENDIX 3 - CHRONOLOGICAL LITERATURE LIST

- Bazjanac, V., & Crawley, D. (1997) The implementation of industry foundation classes in simulation tools for the building industry. Proceedings of the 1997 International Building Simulation Conference. [http://www.ibpsa.org/proceedings/bs1997/bs97\\_p125.pdf](http://www.ibpsa.org/proceedings/bs1997/bs97_p125.pdf)
- Kaitanen, K. (1997) Java Based Solution for Generic Product Data Browsing. Proceedings of the 1997 CIB W78 Conference. <http://itc.scix.net/cgi-bin/works/Show?w78-1997-199>
- Agger, K. (1998) Geno-object-classes in construction IT. Proceedings of the 1998 CIB W78 Conference. <http://itc.scix.net/cgi-bin/works/Show?w78-1998-1>
- Alexander, J., Coble, R., Crawford, J., Drogemuller, R., Newton, P., Wilson, B., & Kwok-Keung, Y. (1998) Information and communication in construction: closing the loop. Proceedings of the 1998 CIB W78 Conference. <http://itc.scix.net/cgi-bin/works/Show?w78-1998-4>
- Alshawi, M., Aouad, G., Child, T., Faraj, I., & Underwood, J. (1998) The implementation of integrated environments using the industry foundation classes standards and web technologies. Proceedings of the 1998 CIB W78 Conference. <http://itc.scix.net/cgi-bin/works/Show?w78-1998-6>
- Debras, P., Monceyron, J., Buckley, E., Leonard, D., Carpentier, G., Praet, S. V., & Seifert, L. (1998) The construction pilot GENIAL: implementing the GEN vision in the construction domain. Proceedings of the 1998 CIB W78 Conference. <http://itc.scix.net/cgi-bin/works/Show?w78-1998-17>
- Laitinen, J. (1998) Model based construction process management. PhD Thesis - The Royal Institute of Technology, Construction Management and Economics. Stockholm, Sweden. <http://itc.scix.net/cgi-bin/works/Show?dcce>
- Marir, F., Aouad, G., & Cooper, G. (1998) OSCONCAD: A model-based CAD system integrated with computer applications. Journal of Information Technology in Construction – ITcon. Vol.3. 26-46. [http://www.itcon.org/cgi-bin/works/Show?1998\\_3](http://www.itcon.org/cgi-bin/works/Show?1998_3)
- Bazjanac, V., & Crawley, D. (1999) Industry foundation classes and interoperable commercial software in support of design of energy-efficient buildings. Proceedings of the 1999 International Building Simulation Conference. [http://www.ibpsa.org/%5Cproceedings%5CBS1999%5CBS99\\_B-18.pdf](http://www.ibpsa.org/%5Cproceedings%5CBS1999%5CBS99_B-18.pdf)
- Ekholm, A. (1999) Co-ordination of classifications for product modelling and established building classifications. Proceedings of the 1999 CIB W78 Conference. <http://itc.scix.net/cgi-bin/works/Show?w78-1999-2465>
- Faraj, I., Alshawi, M., Aouad, G., Child, T., Underwood, J. (1999) Distributed object environment: Using international standards for data exchange in the construction industry. Computer-Aided Civil and Infrastructure Engineering. Vol. 14 (6). 395-405. doi: 10.1111/0885-9507.00158
- Froese, T., Fischer, M., Grobler, F., Ritzenthaler, J., Yu, K., Sutherland, S., Staub, S., et al. (1999) Industry foundation classes for project management - a trial implementation. Journal of Information Technology in Construction – ITcon. Vol. 4. 17-36. [http://www.itcon.org/cgi-bin/works/Show?1999\\_2](http://www.itcon.org/cgi-bin/works/Show?1999_2)
- Jardim-Goncalves, R., Sousa, P., Pimentao, J., Steiger-Garcia, A., Grilo, A., & Tadeu, L. (1999) Integration of planning and control activities for building and construction - experiencing standards. Proceedings of the 1999 CIB W78 Conference. <http://itc.scix.net/cgi-bin/works/Show?w78-1999-2180>
- Kiviniemi, A. (1999) IAI and IFC-State-of-the-Art. Proceedings of the 1999 CIB W78 Conference. <http://itc.scix.net/cgi-bin/works/Show?w78-1999-2157>
- Liebich, T., & Wix, J. (1999) Highlights of the development process of industry foundation classes. Proceedings of the 1999 CIB W78 Conference. <http://itc.scix.net/cgi-bin/works/Show?w78-1999-2758>
- Wix, J., Yu, K., & Ottosen, P. (1999) The development of industry foundation classes for facilities management. Proceedings of the 1999 CIB W78 Conference. <http://itc.scix.net/cgi-bin/works/Show?w78-1999-2724>
- Hitchcock, R., Piette, P., & Selkowitz, S. (1999) A building life-cycle information system for tracking building performance metrics. Proceedings of the 1999 CIB W78 Conference. <http://itc.scix.net/cgi-bin/works/Show?w78-1999-2688>
- Akinsola, A., Dawood, N., & Hobbs, B. (2000) Construction planning process improvement using information technology tools. Proceedings of the 2000 CIB W78 Conference. <http://itc.scix.net/cgi-bin/works/Show?w78-2000-40>
- de Grassi, M., Giretti, A., Caneparo, L., & Mecca, S. (2000) Teaching Construction in the Virtual University: The Winds Project. Proceedings of the 2000 CIB W78 Conference. <http://itc.scix.net/cgi-bin/works/Show?w78-2000-252>
- Eden, J., Eng, C. S., & McGeorge, D. (2000) Directions in construction IT strategies in Australia. Proceedings of the 2000 CIB W78 Conference. <http://itc.scix.net/cgi-bin/works/Show?w78-2000-321>
- Faraj, I., Alshawi, M., Aouad, G., Child, T., & Underwood, J. (2000) An industry foundation classes Web-based collaborative construction computer environment: WISPER. Automation in Construction. Vol. 10 (1). 79-99. doi:10.1016/S0926-5805(99)00038-2
- Froese, T., Yu, K., Liston, K., & Fischer, M. (2000) System architectures for AEC interoperability. Proceedings of the 2000 CIB W78 Conference. <http://itc.scix.net/cgi-bin/works/Show?w78-2000-362>
- Hassanain, M., Froese, T., & Vanier, D. (2000) IFC-based data model for integrated maintenance management. Proceedings of the 2000 International ASCE Conference on Computing and Building Engineering. <http://cedb.asce.org/cgi/WWWdisplay.cgi?122672>
- Nyambayo, J., Amor, R., Faraj, I., & Wix, J. (2000) External Product Library System – An Implementation of the Industry Foundation Classes Release 2.0 Library Model. Proceedings of the 2000 Product Data Technology Europe Symposium. <https://www.cs.auckland.ac.nz/~trebor/papers/NYAM00A.pdf>
- Staub-French, S., & Fischer, M. (2000) Formalisms and mechanisms needed to maintain cost estimates based on an IFC product model. Proceedings of the 2000 ICCBE Conference. <http://cedb.asce.org/cgi/WWWdisplay.cgi?122662>
- Vassileva, S. (2000) Constructing an integrated client/server framework for operative checking of building code. Proceedings of the 2000 CIB W78 Conference. <http://itc.scix.net/cgi-bin/works/Show?w78-2000-996>
- Yu, K., Froese, T., Grobler, F. (2000) A Development framework for data models for computer-integrated facilities management. Automation in Construction Vol. 9 (2) 145-167. doi:10.1016/S0926-5805(99)00002-3
- Heinisuo, M., Karstila, K., & Pehrsson, R. (2000) Product modelling and data exchange for constructional steelwork. Proceedings of the 2000 CIB W78 Conference. <http://itc.scix.net/cgi-bin/works/Show?w78-2000-448>

- Watson, A., & Wambugu, W. (2000) A product model based architecture for engineering applications software. Proceedings of the 2000 CIB W78 Conference. <http://itc.scix.net/cgi-bin/works/Show?w78-2000-1017>
- van Nederveen, S., & Tolman, F. (2001) Neutral object tree support for inter-discipline communication in large-scale construction. *Journal of Information Technology in Construction – ITcon*. Vol. 6. 35-44. [http://www.itcon.org/cgi-bin/works/Show?2001\\_3](http://www.itcon.org/cgi-bin/works/Show?2001_3)
- Hassanain, M.A., Froese, T.M., Vanier, D.J. (2001) Development of a maintenance management model based on IAI standards. *Artificial Intelligence in Engineering*. Vol. 15 (2) 177–193. doi: 10.1016/S0954-1810(01)00015-2
- IAI (2001) IFC 2x implementation guide. IAI Documentation. 68p. <http://www.civ.utoronto.ca/sect/coneng/tamer/Refereneces/IFC/IFC%20implemntation%20guide.pdf>
- Karstila, K., & Serén, K. (2001) IFC Release 2.0 Certification testing – IFC Schema Refinement. Technical Report from the BLIS Project. 35p. [http://www.blis-project.org/certification/schema/IFC\\_R2\\_CertificationTesting\\_SchemaRefinement\\_V10\\_2001-05-23.pdf](http://www.blis-project.org/certification/schema/IFC_R2_CertificationTesting_SchemaRefinement_V10_2001-05-23.pdf)
- Popova, M., Johansson, P., & Lindgren, H (2001) Case-based reasoning and information structures in collaborative design: the use of product models for information evolution. Proceedings of the 2001 CIB W78 Conference. <http://itc.scix.net/cgi-bin/works/Show?w78-2001-11>
- Akinci, B., Fischer, M., Kunz, J. (2002) Automated generation of work spaces required by construction activities. *Journal of Construction Engineering and Management*. 128(4), 306–315. doi:10.1061/(ASCE)0733-9364(2002)128:4(306)
- Amor, R., & Ge, C. (2002) Mapping IFC versions. Proceedings of the 2002 ECPPM Conference. <https://www.cs.auckland.ac.nz/~trebor/papers/AMOR02A.pdf>
- Amorim, S., Peixoto, L., Madeira, L., & Nunes, C. (2002) Establishing the basis for systems interoperability: the terminology challenge. Proceedings of the 2002 CIB W78 Conference. <http://itc.scix.net/cgi-bin/works/Show?w78-2002-40>
- Bazjanac, V. (2002) Early lessons from deployment of IFC compatible software. Proceedings of the 2003 ECPPM Conference. <https://cbs.lbl.gov/sites/all/files/51548.PDF>
- Bazjanac, V., Forester, J., Haves, P., Sucic, D., & Xu, P. (2002) HVAC component data modeling using industry foundation classes. Proceedings of the 2002 Systems Simulation in Buildings Conference. <http://eetd.lbl.gov/node/52141>
- Crouse, B., Krafczyk, M., Kühner, S., Rank, E., Van Treeck, C. (2002) Indoor air flow analysis based on lattice Boltzmann methods. *Energy and Buildings*. Vol. 34 (9) 941-949. doi:10.1016/S0378-7788(02)00069-5
- Dawood, N., Sriprasert, E., Mallasi, Z., & Hobbs, B. (2002) Development of an integrated information resource base for 4DVR construction process and simulation. Proceedings of the 2002 CIB W78 Conference. <http://itc.scix.net/cgi-bin/works/Show?w78-2002-88>
- Ekholm, A. (2002) Principles for classification of properties of construction objects. Proceedings of the 2002 CIB W78 Conference. <http://itc.scix.net/cgi-bin/works/Show?w78-2002-91>
- Fischer, M., & Kam, C. (2002) PM4D final report. CIFE Technical Report nr 143. pp. 49. [http://cic.vtt.fi/vera/documents/pm4d\\_final\\_report.pdf](http://cic.vtt.fi/vera/documents/pm4d_final_report.pdf)
- Gehre, A., & Katranuschkov, P. (2002) Human-Centred Knowledge-Based Model Access Service for Engineers. Proceedings of the 2002 CIB W78 Conference. <http://itc.scix.net/cgi-bin/works/Show?w78-2002-64>
- Halfawy, M., & Froese, T. (2002) Modeling and implementation of smart AEC objects: an IFC perspective. Proceedings of the 2002 CIB W78 Conference. <http://itc.scix.net/cgi-bin/works/Show?w78-2002-60>
- Halfawy, M., Pouria, A., & Froese, T. (2002) Developing message-based interoperability protocols for distributed AEC/FM systems. Proceedings of the 2002 CIB W78 Conference. <http://itc.scix.net/cgi-bin/works/Show?w78-2002-61>
- Halfawy, M.R., Froese, T. (2002) A component-based framework for integrated AEC/FM project systems. Proceedings, Annual Conference - Canadian Society for Civil Engineering. doi: 10.1.1.117.9679
- Karola, A., Lahtela, H., Hänninen, R., Hitchcock, R., Chen, Q., Dajka, S., Hagström, K. (2002) BPro COM-Server - Interoperability between software tools using industrial foundation classes. *Energy and Buildings*. Vol. 34 (9). 901-907. doi: 10.1016/S0378-7788(02)00066-X
- Kim, I., Liebich, T., & Kim, S. (2002) Development of a two dimensional model space extension for IAI/IFC2. X2nd model. *Journal of Information Technology in Construction – ITcon*. Vol. 8. 219-230 [http://www.itcon.org/cgi-bin/works/Show?2003\\_16](http://www.itcon.org/cgi-bin/works/Show?2003_16)
- Maissa, S., Frachet, J., Lombardo, J., Bourdeau, M., & Soubra, S. (2002) Regulation checking in a Virtual Building. Proceedings of the 2002 CIB W78 Conference. <http://itc.scix.net/cgi-bin/works/Show?w78-2002-26>
- Sullivan, D., Keane, M., & Kelliher, D. (2002) Specification of a STEP Compliant Integrated Environment to Support Performance Based Assessment and Control of Building Energy Systems. Proceedings of the 2002 International Conference on Systems Simulation of Buildings. <http://zuse.ucc.ie/iruse/papers/osullivan-p01v1.pdf>
- Popova, M., Johansson, P., & Lindgren, H. (2002) An integrated platform for case-based design. Proceedings of the 2002 CIB W78 Conference. <http://itc.scix.net/cgi-bin/works/Show?w78-2002-49>
- Wix, J., & Katranuschkov, P. (2002) Defining the matrix of communication processes in the AEC/FM industry: current developments and gap analysis. Proceedings of the 2002 CIB W78 Conference. <http://itc.scix.net/cgi-bin/works/Show?w78-2002-63>
- Kazi, A.S., Nummelin, O., Pirinen, V., Huhtala, M., Huittinen, E. (2002) Management of best practices in construction through interfacing with product models. VTT Symposium. [http://cic.vtt.fi/projects/globemen/book/24\\_kazi2.pdf](http://cic.vtt.fi/projects/globemen/book/24_kazi2.pdf)
- Adachi, Y. (2003) Overview of partial model query language. Proceedings of the 10th ISPE International Conference on Concurrent Engineering Research and Application, Enhanced Interoperable Systems. <http://cic.vtt.fi/projects/ifcsvg/tec/VTT-TEC-ADA-12.pdf>
- Akinci, B., & Boukamp, F. (2003) Representation and integration of as-built information to IFC based product and process models for automated assessment of as-built conditions. NIST SPECIAL PUBLICATION. <http://fire.nist.gov/bfrlpubs/build02/PDF/b02050.pdf>
- El Diraby, T., Fies, B., Lima, C. (2003) An ontology for construction knowledge management. Proceedings, Annual Conference - Canadian Society for Civil Engineering [No working link available]

- Froese, T. (2003) Future directions for IFC-based interoperability. *Journal of Information Technology in Construction – ITcon*. Vol. 8. 231-246. [http://www.itcon.org/cgi-bin/works/Show?2003\\_17](http://www.itcon.org/cgi-bin/works/Show?2003_17)
- Harrison, D., Donn, M., & Skates, H. (2003) Applying web services within the AEC industry: enabling semantic searching and information exchange through the digital linking of the knowledge base. *Proceedings of the 2003 CIB W78 Conference*. <https://www.cs.auckland.ac.nz/research/conferences/w78/papers/W78-41.pdf>
- Hassanain, M.A., Froese, T.M., Vanier, D.J. (2003) Implementation of a distributed, model-based integrated asset management system. *Journal of Information Technology in Construction – ITcon*. Vol. 8. 119-134. [http://www.itcon.org/cgi-bin/works/Show?2003\\_10](http://www.itcon.org/cgi-bin/works/Show?2003_10)
- Hitchcock, R.J. (2003) Software Interoperability for Energy Simulation. ASHRAE Winter Meetings CD, Technical and Symposium Papers. <http://eetd.lbl.gov/node/52152>
- Kähkönen, Kalle, & Leinonen, J. (2003) Visual product chronology as a solution for accessing building product model data. *Proceedings of the 2003 CIB W78 Conference*. <https://www.cs.auckland.ac.nz/research/conferences/w78/papers/W78-17.pdf>
- Kam, C., Fischer, M., Hänninen, R., Karjalainen, A., Laitinen, J. (2003) The product model and fourth dimension project. *Journal of Information Technology in Construction – ITcon*. Vol. 8. 137-166. [http://www.itcon.org/cgi-bin/works/Show?2003\\_12](http://www.itcon.org/cgi-bin/works/Show?2003_12)
- Katranuschkov, P., Gehre, A., & Scherer, R. J. (2003) An ontology framework to access IFC model data. *Journal of Information Technology in Construction – ITcon*. Vol. 8. 413-437. [http://www.itcon.org/cgi-bin/works/Show?2003\\_29](http://www.itcon.org/cgi-bin/works/Show?2003_29)
- Lee, K., Chin, S., & Kim, J. (2003) A core system for design information management using Industry Foundation Classes. *Computer-Aided Civil and Infrastructure Engineering*. Vol. 18 (4). 286-298. <http://onlinelibrary.wiley.com/doi/10.1111/1467-8667.00318/abstract>
- Owolabi, A., Anumba, C., & El-Hamalawi, A. (2003) Architecture for implementing IFC-based online construction product libraries. *Journal of Information Technology in Construction – ITcon*. Vol. 8. 201-218. <http://www.itcon.org/2003/15>
- Rönneblad, A., & Olofsson, T. (2003) Application of IFC in design and production of precast concrete constructions. *Journal of Information Technology in Construction – ITcon*. Vol. 8. 167-180. <http://www.itcon.org/2003/13>
- Spearpoint, M. J. (2003) Properties for fire engineering design in New Zealand and the IFC building product model. *Proceedings of the 2003 CIB W78 Conference*. <http://ir.canterbury.ac.nz/handle/10092/485>
- Staub-French, S. (2003) Providing Cost and Constructability Feedback to Designers. *Proceedings of the Construction Research Congress, Winds of Change: Integration and Innovation in Construction*. doi: 10.1061/40671(2003)18
- van Treeck, C., Romberg, R., & Rank, E. (2003) Simulation based on the product model standard IFC. *Proceedings of the 2003 International Building Simulation Conference*. [http://www.inive.org/members\\_area/medias/pdf/Inive%5CIBPSA%5CUFSC75.pdf](http://www.inive.org/members_area/medias/pdf/Inive%5CIBPSA%5CUFSC75.pdf)
- Vanlande, R., Cruz, C., & Nicolle, C. (2003) Managing IFC for civil engineering projects. *Proceedings of the 2003 International Conference on Information and Knowledge Management*. doi: 10.1145/956863.956899
- Weise, M., Katranuschkov, P., & Scherer, R. J. (2003) Generalised model subset definition schema. *Proceedings of the 2003 CIB W78 Conference*. <https://www.cs.auckland.ac.nz/research/conferences/w78/papers/W78-54.pdf>
- Weise, M., Katranuschkov, P., Liebich, T., & Scherer, R. J. (2003) Structural analysis extension of the IFC modelling framework. *Journal of Information Technology in Construction – ITcon*. Vol. 8. 181-200. <http://www.itcon.org/2003/14/>
- Yabuki, N., & Shitani, T. (2003) An IFC-based product model for RC or PC slab bridges. *Proceedings of the 2003 CIB W78 Conference*. <http://itc.scix.net/data/works/att/w78-2003-463.content>
- Yang, Q. (2003) IFC-compliant design information modelling and sharing. *Journal of Information Technology in Construction – ITcon*. Vol. 8. <http://www.itcon.org/2003/1>
- Yang, Y., Wang, S., Low, S., & Goh, B. (2003) Adaptations of QFD for Constructable Designs within a Concurrent Construction Environment: An Information Modeling Approach. *Proceedings of the 2003 CIB W78 Conference*. <http://itc.scix.net/data/works/att/w78-2003-479.content>
- Lam, K.P., Wong, N.H., Shen, L.J., Mahdavi, A., Leong, E., Solihin, W., Au, K.S., Kang, Z. (2003) Mapping of industry building product model for detailed thermal simulation and analysis. *Advances in Engineering Software*. Vol. 37 (3) 133-145. doi:10.1016/j.advengsoft.2005.05.005.
- Augenbroe, G., De Wilde, P., Moon, H.J., Malkawi, A. (2004) An interoperability workbench for design analysis integration. *Energy and Buildings*. Vol. 36 (8). 737-748. doi:10.1016/j.enbuild.2004.01.049
- Bazjanac, V. (2004) Building energy performance simulation as part of interoperable software environments. *Building and Environment*. Vol. 34. 879–883. doi: 10.1016/j.buildenv.2004.01.012
- Bazjanac, V., & Maile, T. (2004) IFC HVAC interface to EnergyPlus - A case of expanded interoperability for energy simulation. *Proceedings of the 2004 SimBuild Conference*. <http://eetd.lbl.gov/node/50927>
- Chen, P.-H., Wan, C., Tiong, R.L.K., Ting, S.K., Yang, Q. (2004) Augmented IDEF1-based process-oriented information modeling. *Automation in Construction*. Vol. 14 (6) 735-750. doi:10.1016/j.autcon.2004.04.013
- Cruz, C., Vanlande, R., Nicolle, C. (2004) ACTIVE3D: Semantic and 3D databases for civil engineering projects. *Proceedings of the International Conference on Information and Knowledge Engineering*.
- Danso-Amoako, M. O., O'Brien, W., & Issa, R. R. (2004) A case study of IFC and CIS/2 support for steel supply chain processes. *Proceedings of the 2004 ICCCB Conference*. [https://e-pub.uni-weimar.de/opus4/files/119/iccbe-x\\_135.pdf](https://e-pub.uni-weimar.de/opus4/files/119/iccbe-x_135.pdf)
- Garcia, A., Kunz, J., Ekstrom, M., & Kiviniemi, A. (2004) Building a project ontology with extreme collaboration and virtual design and construction. *Advanced Engineering Informatics*. Vol. 18 (2). 71-83. doi:10.1016/j.aei.2004.09.001
- Kuhner, S., Crouse, B., Rank, E., Tölke, J., Krafczyk, M. (2004) From a product model to visualization: Simulation of indoor flows with Lattice-Boltzmann methods. *Computer-Aided Civil and Infrastructure Engineering*. Vol. 19 (6). 411-420. doi: 10.1111/j.1467-8667.2004.00366.x
- Morrissey, E., O'Donnell, J., Keane, M., & Bazjanac, V. (2004) Specification and implementation of IFC based performance metrics to support building life cycle assessment of hybrid energy systems. *Building Simulation Conference*. <http://escholarship.org/uc/item/81c0z89t>

- O'Sullivan, D.T.J., Keane, M.M., Kelliher, D., Hitchcock, R.J. (2004) Improving building operation by tracking performance metrics throughout the building lifecycle (BLC). *Energy and Buildings*. Vol. 36. 1075-1090. doi:10.1016/j.enbuild.2004.03.003
- Spearpoint, M. J. (2003) Integrating the IFC building product model with fire zone models. *Proceedings of the 2003 International Conference on Building Fire Safety*. <http://ir.canterbury.ac.nz/handle/10092/486>
- Wan, C., Chen, P., & Tiong, R. (2004) Assessment Of Ifcs For Structural Analysis Domain. *Journal of Information Technology in Construction – ITcon*. Vol. 9. 75-95. <http://www.itcon.org/2004/5>
- Yang, Q.Z., Xu, X. (2004) Design knowledge modeling and software implementation for building code compliance checking. *Building and Environment*. Vol. 39 (6). 689–698. doi:10.1016/j.buildenv.2003.12.004
- Bazjanac, V. (2005) Model based cost and energy performance estimation during schematic design. *Proceedings of the 2005 CIB W78 Conference*. <http://itc.scix.net/cgi-bin/works/Show?w78-2005-a11-3-bazjanac>
- Beetz, J., van Leeuwen, J., & de Vries, B. (2005) An ontology web language notation of the industry foundation classes. *Proceedings of the 2005 CIB W78 Conference*. <http://itc.scix.net/cgi-bin/works/Show?w78-2005-d1-4-beetz>
- Chen, P., Cui, L., Wan, C., Yang, Q., Ting, S., & Tiong, R. (2005) Implementation of IFC-based web server for collaborative building design between architects and structural engineers. *Automation in Construction*. Vol. 14 (1) 115–128. doi:10.1016/j.autcon.2004.08.013
- Christiansson, P., & Carlsen, M. (2005) Virtual Buildings from theory to practice. *Proceedings of the 2005 CIB W78 Conference*. <http://itc.scix.net/cgi-bin/works/Show?w78-2005-d1-1-christiansson>
- Ekholm, A. (2005) ISO 12006-2 and IFC–Prerequisites for coordination of standards for classification and interoperability. *Journal of Information Technology in Construction – ITcon*. Vol. (10) 275-289. <http://www.itcon.org/2005/19>
- Gökce, K., Scherer, R. J., & Dikbas, H. (2005) Web-based integrated construction management solution. *Proceedings of the 2005 CIB W78 Conference*. <http://itc.scix.net/cgi-bin/works/Show?w78-2005-a5-1-goekce>
- Halfawy, M., & Froese, T. (2005) Integration of data and processes of AEC projects using the industry foundation classes. *Proceedings of the 2005 CSCE Specialty Conference on Infrastructure Technologies*.
- Halfawy, M., & Froese, T. (2005) Building integrated architecture/engineering/construction systems using smart objects: methodology and implementation. *Journal of Computing in Civil Engineering*. Vol. 19 (2). 172-181. doi: 10.1061/(ASCE)0887-3801(2005)19:2(172)
- Hammad, A., Fazio, P., He, H.S. (2005) Computer tool to achieve better performance and integration of building envelopes with structural and mechanical systems. *Proceedings of the Annual Conference - Canadian Society for Civil Engineering*.
- Jacoski, C. (2005) Prototype of semantic interoperability between different modalities of 2D-CAD design. *Proceedings of the 2005 CIB W78 Conference*. <http://itc.scix.net/cgi-bin/works/Show?w78-2005-d2-4-jacoski>
- Karavan, A., Neugebauer, M., Kabitzsch, K. (2005) Integration of Building Automation Network Design and 3D Construction Tools by IFC Standard. Technical Report - Dresden University of Technology. doi: 10.3182/20051114-2-MX-3901.00034
- Karstila, K., & Serén, K. (2005) IFC Aspect Card Library. Technical Report from the Pro-IT Project. [http://virtual.vtt.fi/virtual/proj6/proit/julkiset\\_tulokset/proit\\_aspectcardlibrary\\_v1\\_1\\_2005\\_01\\_27.pdf](http://virtual.vtt.fi/virtual/proj6/proit/julkiset_tulokset/proit_aspectcardlibrary_v1_1_2005_01_27.pdf)
- Kiviniemi, A., Fischer, M., & Bazjanac, V. (2005) Integration of multiple product models: Ifc model servers as a potential solution. *Proceedings of the 2005 CIB W78 Conference*. <http://itc.scix.net/data/works/att/w78-2005-KN-w2-1-Kiviniemi>
- Kiviniemi, A., Fischer, M., & Bazjanac, V. (2005) Multi-model Environment: Links between Objects in Different Building Models. *Proceedings of the 2005 CIB W78 Conference*. <http://itc.scix.net/cgi-bin/works/Show?w78-2005-d4-4-kiviniemi>
- Lydon, G., Keane, M., & Ingham, D. (2005) Implementation of an interface between a CFD energy analysis and an IFC building product model. *Proceedings of the 2005 International Conference on Information Visualisation*. 277 – 286. doi: 10.1109/IV.2005.60
- Mozaffari, E., Hammad, A., El-Ammari, K. (2005) Virtual reality models for location-based facilities management systems. *Proceedings of the Annual Conference - Canadian Society for Civil Engineering*.
- Nassar, K., Nguyen, T.-H. (2005) Using building topological information to check for means of egress building code compliance. *Journal of Information Technology in Construction – ITcon*. Vol. 10. 219-227. <http://www.itcon.org/2005/15>
- Nour, M., & Beucke, K. (2005) Manipulating IFC model data in conjunction with CAD. *Proceedings of the 2005 CIB W78 Conference*. <http://itc.scix.net/cgi-bin/works/Show?w78-2005-d4-1-nour>
- Sullivan, B., & Keane, M. (2005) Specification of an IFC based intelligent graphical user interface to support building energy simulation. *Proceedings of the 2005 National Symposium of The Irish Research Council for Science, Engineering and Technology*. <http://zuse.ucc.ie/iruse/papersNew/IBPSA2005BarryOSullivan.pdf>
- Petrinja, E., Stankovski, V., & Turk, Z. (2005) Provenance metadata for shared product model databases. *Proceedings of the 2005 CIB W78 Conference*. <http://itc.scix.net/cgi-bin/works/Show?w78-2005-d1-3-petrinja>
- Schevers, H., & Drogemuller, R. (2005) Converting the industry foundation classes to the web ontology language. *Proceedings of the First International Conference on Semantics, Knowledge and Grid*. doi:10.1109/SKG.2005.59
- Semenov, V., Bazhan, A., Morozov, S., & Tarlapan, O. (2005) Efficient verification of product model data: an approach and an analysis. *Proceedings of the 2005 CIB W78 Conference*. <http://itc.scix.net/cgi-bin/works/Show?w78-2005-d4-2-semenov>
- Tanyer, A., & Aouad, G. (2005) Moving beyond the fourth dimension with an IFC-based single project database. *Automation in Construction*. Vol. 14 (1). doi:10.1016/j.autcon.2004.06.002
- Turk, Z. (2005) Engineering grid - A blueprint for the next generation collaborative engineering. *Proceedings of the 2005 ASCE International Conference on Computing in Civil Engineering*. doi: 10.1061/40794(179)119
- Weise, M., & Katranuschkov, P. (2005) Supporting State-based Transactions in Collaborative Product Modelling Environments. *Proceedings of the 2005 CIB W78 Conference*. <http://itc.scix.net/cgi-bin/works/Show?w78-2005-d4-3-weise>
- Zhang, C., Hammad, A. (2005) Spatio-temporal issues in infrastructure lifecycle management systems. *Proceedings of the Annual Conference - Canadian Society for Civil Engineering*

- Karavan, A., Neugebauer, M., & Kabitzsch, K. (2005) Merging Building Automation Network Design and IFC 2x Construction Projects. Proceedings of the 2005 CIB W78 Conference. <http://itc.scix.net/cgi-bin/works/Show?w78-2005-a7-4-karavan>.
- Aranda-Mena, G., Wakefield, R. (2006) Interoperability of building information - Myth or reality? Proceedings of the 6th European Conference on Product and Process Modelling - eWork and eBusiness in Architecture, Engineering and Construction, ECPPM 2006. <http://mams.rmit.edu.au/lrssi7jid7nd4.pdf>
- Beetz, J., van Leeuwen, J., & de Vries, B. (2006) Towards a topological reasoning service for IFC-based building information models in a Semantic Web context. Proceedings of the Joint CIB W78, W102, ICCCB, ICC, and DMUCE International Conference. <http://itc.scix.net/cgi-bin/works/Show?w78-2006-tf527>
- Bell, H., Björkhaug, L. (2006) A buildingSMART ontology. Proceedings of the 6th European Conference on Product and Process Modelling - eWork and eBusiness in Architecture, Engineering and Construction, ECPPM 2006. [http://www.buildingsmart.no/sites/default/files/2006\\_06\\_16\\_buildingSMART\\_Ontology\\_LBJ\\_HBE.pdf](http://www.buildingsmart.no/sites/default/files/2006_06_16_buildingSMART_Ontology_LBJ_HBE.pdf)
- Bletzinger, K.-U., Lal'hr, A. (2006) Prediction of interdisciplinary consequences for decisions in AEC design processes. Journal of Information Technology in Construction – ITcon. Vol. 11. 529-545. <http://www.itcon.org/2006/38>.
- Danso-Amoako, M. O., Issa, R. R., & Cox, R. (2006) Developing a framework to support data exchange from heterogenous sources via IFC and web services. Proceedings of the Joint CIB W78, W102, ICCCB, ICC, and DMUCE International Conference. <http://itc.scix.net/cgi-bin/works/Show?w78-2006-tf384>
- Deng, X. Y., & Chang, T. P. (2006) Creating structural model from IFC-based architectural model. Proceedings of the Joint CIB W78, W102, ICCCB, ICC, and DMUCE International Conference. <http://itc.scix.net/data/works/att/w78-2006-tf577>
- Ercoskun, K., Dikbas, H., & Turk, Z. (2006) Linking CRM and CAD with IFC-CRM gate. Proceedings of the Joint CIB W78, W102, ICCCB, ICC, and DMUCE International Conference. <http://itc.scix.net/cgi-bin/works/Show?w78-2006-tf589>
- Fu, C., Aouad, G., Lee, A., Mashall-Ponting, A., & Wu, S. (2006) IFC model viewer to support nD model application. Automation in Construction. Vol. 15 (2) 178-185. doi:10.1016/j.autcon.2005.04.002
- Gehre, A., Katranuschkov, P., Scherer, R.J. (2006) Management and integration of virtual enterprise information on grid spaces through semantic web ontologies. Proceedings of the 6th European Conference on Product and Process Modelling - eWork and eBusiness in Architecture, Engineering and Construction, ECPPM 2006
- Koch, C., Firmenich, B. (2006) Operative models for the introduction of additional semantics into the cooperative planning process. E.d. (Smith) Lecture Notes in Computer Science (including subseries Lecture Notes in Artificial Intelligence and Lecture Notes in Bioinformatics). 376-382
- Lê, M., Mohus, F., Kvarsvik, O., & Lie, M. (2006) The HITOS project - A full scale IFC test. Proceedings of the 2006 ECPPM Conference. [http://www.buildingsmart.no/sites/default/files/9\\_The\\_HITOS\\_Project\\_-\\_A\\_Full\\_Scale\\_IFC\\_Test.pdf](http://www.buildingsmart.no/sites/default/files/9_The_HITOS_Project_-_A_Full_Scale_IFC_Test.pdf)
- Lee, G., Eastman, C. M., & Sacks, R. (2006) Generating IFC views and conformance classes using GTPPM. Proceedings of the Joint CIB W78, W102, ICCCB, ICC, and DMUCE International Conference. <http://itc.scix.net/cgi-bin/works/Show?w78-2006-tf263>
- Lipman, R. (2006) Mapping Between the CIMSteel Integration Standards and Industry Foundation Classes Product Models for Structural Steel. Proceedings of the Joint CIB W78, W102, ICCCB, ICC, and DMUCE International Conference. <http://itc.scix.net/cgi-bin/works/Show?w78-2006-tf476>
- Nour, M., Firmenich, B., Richter, T., & Koch, C. (2006) A versioned IFC database for multi-disciplinary synchronous cooperation. Proceedings of the Joint CIB W78, W102, ICCCB, ICC, and DMUCE International Conference. <http://itc.scix.net/cgi-bin/works/Show?w78-2006-tf111>
- Owolabi, A., Anumba, C., El-Hamalawi, A., & Harper, C. (2006) Development of an industry foundation classes assembly viewer. Journal of Computing in Civil Engineering. Vol. 20 (2). 121-131. doi: 10.1061/(ASCE)0887-3801(2006)20:2(121)
- Serror, M. H., Inoue, J., Adachi, Y., & Fujino, Y. (2006) Building on IFC: e-interaction with-within structural design domain. Proceedings of the Joint CIB W78, W102, ICCCB, ICC, and DMUCE International Conference. <http://itc.scix.net/data/works/att/w78-2006-tf58>
- Spearpoint, M. J. (2006) Fire engineering properties in the IFC building product model and mapping to BRANZFIRE International. Journal on Engineering Performance-Based Fire Codes. <http://ir.canterbury.ac.nz/handle/10092/82>
- Yabuki, N., Lebegue, E., Gual, J., Shitani, T., & Zhantao, L. (2006) International collaboration for developing the bridge product model "IFC-Bridge". Proceedings of the Joint CIB W78, W102, ICCCB, ICC, and DMUCE International Conference. <http://itc.scix.net/cgi-bin/works/Show?w78-2006-tf289>
- Yang, Q.Z., Zhang, Y. (2006) Semantic interoperability in building design: Methods and tools. CAD Computer Aided Design. Vol. 38 (10) doi:10.1016/j.cad.2006.06.003
- Yasaka, A., Kataoka, H., Kasima, K., Takeda, M., Usami, M., Yabuki, N., Matumoto, N., et al. (2006) The development of the reinforced concrete structural model on IFC-specification. Proceedings of the Joint CIB W78, W102, ICCCB, ICC, and DMUCE International Conference. <http://itc.scix.net/cgi-bin/works/Show?w78-2006-tf487>
- Yungui, L., & Baichun, L. (2006) Information-share based upon IFC standard in engineering construction. Proceedings of the Joint CIB W78, W102, ICCCB, ICC, and DMUCE International Conference. <http://itc.scix.net/data/works/att/w78-2006-tf19.pdf>
- Amor, R., Jiang, Y., & Chen, X. (2007) BIM in 2007 – Are we there yet. Proceedings of the Joint CIB W78, W102, ICCCB, ICC, and DMUCE International Conference. [http://itc.scix.net/cgi-bin/works/Show?w78\\_2007\\_78](http://itc.scix.net/cgi-bin/works/Show?w78_2007_78)
- Beetz, J., de Vries, B., & van Leeuwen, J. (2007) RDF-based distributed functional part specifications for the facilitation of service-based architectures. Proceedings of the 2007 CIB W78 Conference. [http://itc.scix.net/cgi-bin/works/Show?w78\\_2007\\_39](http://itc.scix.net/cgi-bin/works/Show?w78_2007_39)
- Campbell, D.A. (2007) Building information modeling: The Web3D application for AEC. Proceedings of the Twelfth International Conference on 3D Web Technology 2007, Web3D 2007. doi: 10.1145/1229390.1229422
- Dimyadi, J. (2007) Generating FDS fire simulation input using IFC-based building information model. M.Sc. Thesis - School of Engineering, University of Canterbury, New Zealand. <http://www.ibrarian.net/navon/page.jsp?paperid=9061768>

- Dimyadi, J., Spearpoint, M. J., & Amor, R. (2007) Generating fire dynamics simulator geometrical input using an IFC-based building information model. *Journal of Information Technology in Construction – ITcon*. Vol. 12. 443-457. <http://www.itcon.org/2007/29>
- Farinha, F., Goncalves, R.J., Garcao, A.S. (2007) Integration of cooperative production and distributed design in AEC. *Advances in Engineering Software*. Vol. 38. (11-12). 772-779. 10.1016/j.advengsoft.2006.08.038
- Fazio, P., He, H., Hammad, A., & Horvat, M. (2007) IFC-based framework for evaluating total performance of building envelopes. *Journal of Architectural Engineering*. Vol. 13(1). 44–53. doi: 10.1061/(ASCE)1076-0431(2007)13:1(44)
- Gökce, K., Scherer, R. J., & Dikbas, H. (2007) IFC-based Computer-integrated Construction Project Management Model. *Proceedings of the 2007 CIB W78 Conference*. [http://itc.scix.net/cgi-bin/works/Show?w78\\_2007\\_46](http://itc.scix.net/cgi-bin/works/Show?w78_2007_46)
- Halfawy, M.M.R., Froese, T.M. (2007) Component-based framework for implementing integrated architectural/engineering/construction project systems. *Journal of Computing in Civil Engineering*. Vol. 21 (6). 441–452. doi: 10.1061/(ASCE)0887-3801(2007)21:6(441)
- Howard, R., & Björk, B-C. (2007) Building information models—experts' views on BIM/IFC developments. *Proceedings of the 2007 CIB W78 Conference*. [http://itc.scix.net/cgi-bin/works/Show?w78\\_2007\\_77](http://itc.scix.net/cgi-bin/works/Show?w78_2007_77)
- Isikdag, U., Aouad, G., Underwood, J., & Trodd, N. (2007) Investigating the applicability of IFC in geospatial environment in order to facilitate the fire response management process. *Proceedings of the 2007 CIB W78 Conference*. [http://itc.scix.net/cgi-bin/works/Show?w78\\_2007\\_96](http://itc.scix.net/cgi-bin/works/Show?w78_2007_96)
- Jacoski, C.A., Lamberts, R. (2007) The lack of interoperability in 2d design - A study in design offices in Brazil. *Journal of Information Technology in Construction – ITcon*. Vol. 12. 251-260. <http://www.itcon.org/2007/17>
- Jadid, M., & Idrees, M. (2007) Cost estimation of structural skeleton using an interactive automation algorithm: A conceptual approach. *Automation in Construction*. Vol. 16 (6). 797–805. doi:10.1016/j.autcon.2007.02.007
- Li, S., Isele, J., & Bretthauer, G. (2007) Application of IFC product data model in computer-integrated building prefabrication. *Proceedings of the 2007 IEEE International Conference on Automation Science and Engineering*. 992 – 996. doi: 10.1109/COASE.2007.4341683
- Luntovskyy, A., Holstein, S., Vasyutynskyy, V., & Guetter, D. (2007) IFC-Based Building Geometry Models for Computer-Aided Design of Wired and Wireless Networks. *Proceedings of the 2007 International Crimean Conference on Microwave and Telecommunication Technology*. 332 – 335. 10.1109/CRMICO.2007.4368737
- Mao, W., Zhu, Y., & Ahmad, I. (2007) Applying metadata models to unstructured content of construction documents: A view-based approach. *Automation in Construction*. Vol. 16 (2) 242-252. doi:10.1016/j.autcon.2006.05.005
- Nachtigall, S. D., & Brucker, B. A. (2007) Facility Composer and PACES Integration; Development of an XML Interface Based on Industry Foundation Classes. Report prepared for the U.S. Army Corps of Engineers Washington, DC. pp. 129. <http://oai.dtic.mil/oai/oai?verb=getRecord&metadataPrefix=html&identifier=ADA475289>
- Nour, M. (2007) Manipulating IFC sub-models in collaborative teamwork environments . *Proceedings of the 2007 CIB W78 Conference*. [http://itc.scix.net/cgi-bin/works/Show?w78\\_2007\\_53](http://itc.scix.net/cgi-bin/works/Show?w78_2007_53)
- Pazlar, T., & Turk, Z. (2007) Evaluation of IFC optimization. *Proceedings of the 2007 CIB W78 Conference*. [http://itc.scix.net/cgi-bin/works/Show?w78\\_2007\\_91](http://itc.scix.net/cgi-bin/works/Show?w78_2007_91)
- Petrinja, E., Stankovski, V., & Turk, Z. (2007) A provenance data management system for improving the product modelling process. *Automation in Construction*. Vol. 16 (4). 485-497. doi:10.1016/j.autcon.2006.08.002
- Plume, J., & Mitchell, J. (2007) Collaborative design using a shared IFC building model—Learning from experience. *Automation in Construction*. Vol. 16 (1). 28-36. doi:10.1016/j.autcon.2005.10.003
- Porkka, J., & Kähkönen, K. (2007) Software development approaches and challenges of 4D product models. *Proceedings of the 2007 CIB W78 Conference*. [http://itc.scix.net/cgi-bin/works/Show?w78\\_2007\\_41](http://itc.scix.net/cgi-bin/works/Show?w78_2007_41)
- Rönkkö, J., & Markkanen, J. (2007) Lightweight 3D IFC Visualization Client. *Proceedings of the 2007 CIB W78 Conference*. [http://itc.scix.net/cgi-bin/works/Show?w78\\_2007\\_45](http://itc.scix.net/cgi-bin/works/Show?w78_2007_45)
- Schevers, H., Mitchell, J., Akhurst, P., Marchant, D., Bull, S., McDonald, K., Drogemuller, R., et al. (2007) Towards digital facility modelling for Sydney opera house using IFC and semantic web technology. *Journal of Information Technology in Construction – ITcon*. Vol. 12. 347-362. <http://www.itcon.org/2007/24>
- Serror, M.H., Inoue, J., Hori, M., Fujino, Y. (2007) Distributed object-based software environment for urban system integrated simulation under urban-scale hazard - Part I: Infrastructure. *Earthquake Engineering and Structural Dynamics*. Vol. 36 (11). 1545–1560. doi: 10.1002/eqe.706
- Song, Y., Hamilton, A., Wang, H. (2007) Built environment data integration using nD modelling. *Journal of Information Technology in Construction – ITcon*. Vol. 12. 429-442. <http://www.itcon.org/2007/28>
- Spearpoint, M. J., & Dimyadi, J. (2007) Sharing fire engineering simulation data using the IFC building information model. *Proceedings of the 2007 International Congress on Modelling and Simulation*. [http://www.mssanz.org.au/MODSIM07/papers/18\\_s56/SharingFire\\_s56\\_Spearpoint\\_.pdf](http://www.mssanz.org.au/MODSIM07/papers/18_s56/SharingFire_s56_Spearpoint_.pdf)
- Wang, Y., Yang, J., Shen, Q. (2007) The application of electronic commerce and information integration in the construction industry. *International Journal of Project Management*. Vol. 25 (2). 158-163. doi:10.1016/j.ijproman.2006.09.008
- Watson, A., Kallian, A., Gibb, A., Anumba, C., Agbasi, E. (2007) Capturing a scheme design for rainscreen cladding. *Computer-Aided Civil and Infrastructure Engineering*. Vol. 22 (2). 149-161. doi: 10.1111/j.1467-8667.2007.00477.x
- Wu, I., & Hsieh, S. (2007) Transformation from IFC Data Model to GML Data Model: Methodology and Tool Development. *Journal of the Chinese Institute of Engineers, Transactions of the Chinese Institute of Engineers, Series A/Chung-kuo Kung Ch'eng Hsueh K'an*. Vol. 30 (6). 1085-1090. doi:10.1080/02533839.2007.9671335
- Yang, D., Eastman, C.M. (2007) A rule-based subset generation method for product data models. *Computer-Aided Civil and Infrastructure Engineering*. doi: 10.1111/j.1467-8667.2006.00476.x
- Yurchyshyna, A., Zucker, C. F., Thanh, N. L., Lima, C., & Zarli, A. (2007) Towards an ontology-based approach for conformance checking modeling in construction. *Proceedings of the 2007 CIB W78 Conference*. [http://itc.scix.net/cgi-bin/works/Show?w78\\_2007\\_12](http://itc.scix.net/cgi-bin/works/Show?w78_2007_12)
