# Supplementary material
Source: MDPI journal article supplement (https://www.mdpi.com/2075-5309/6/1/7)
Supplement: s1 [file s1]

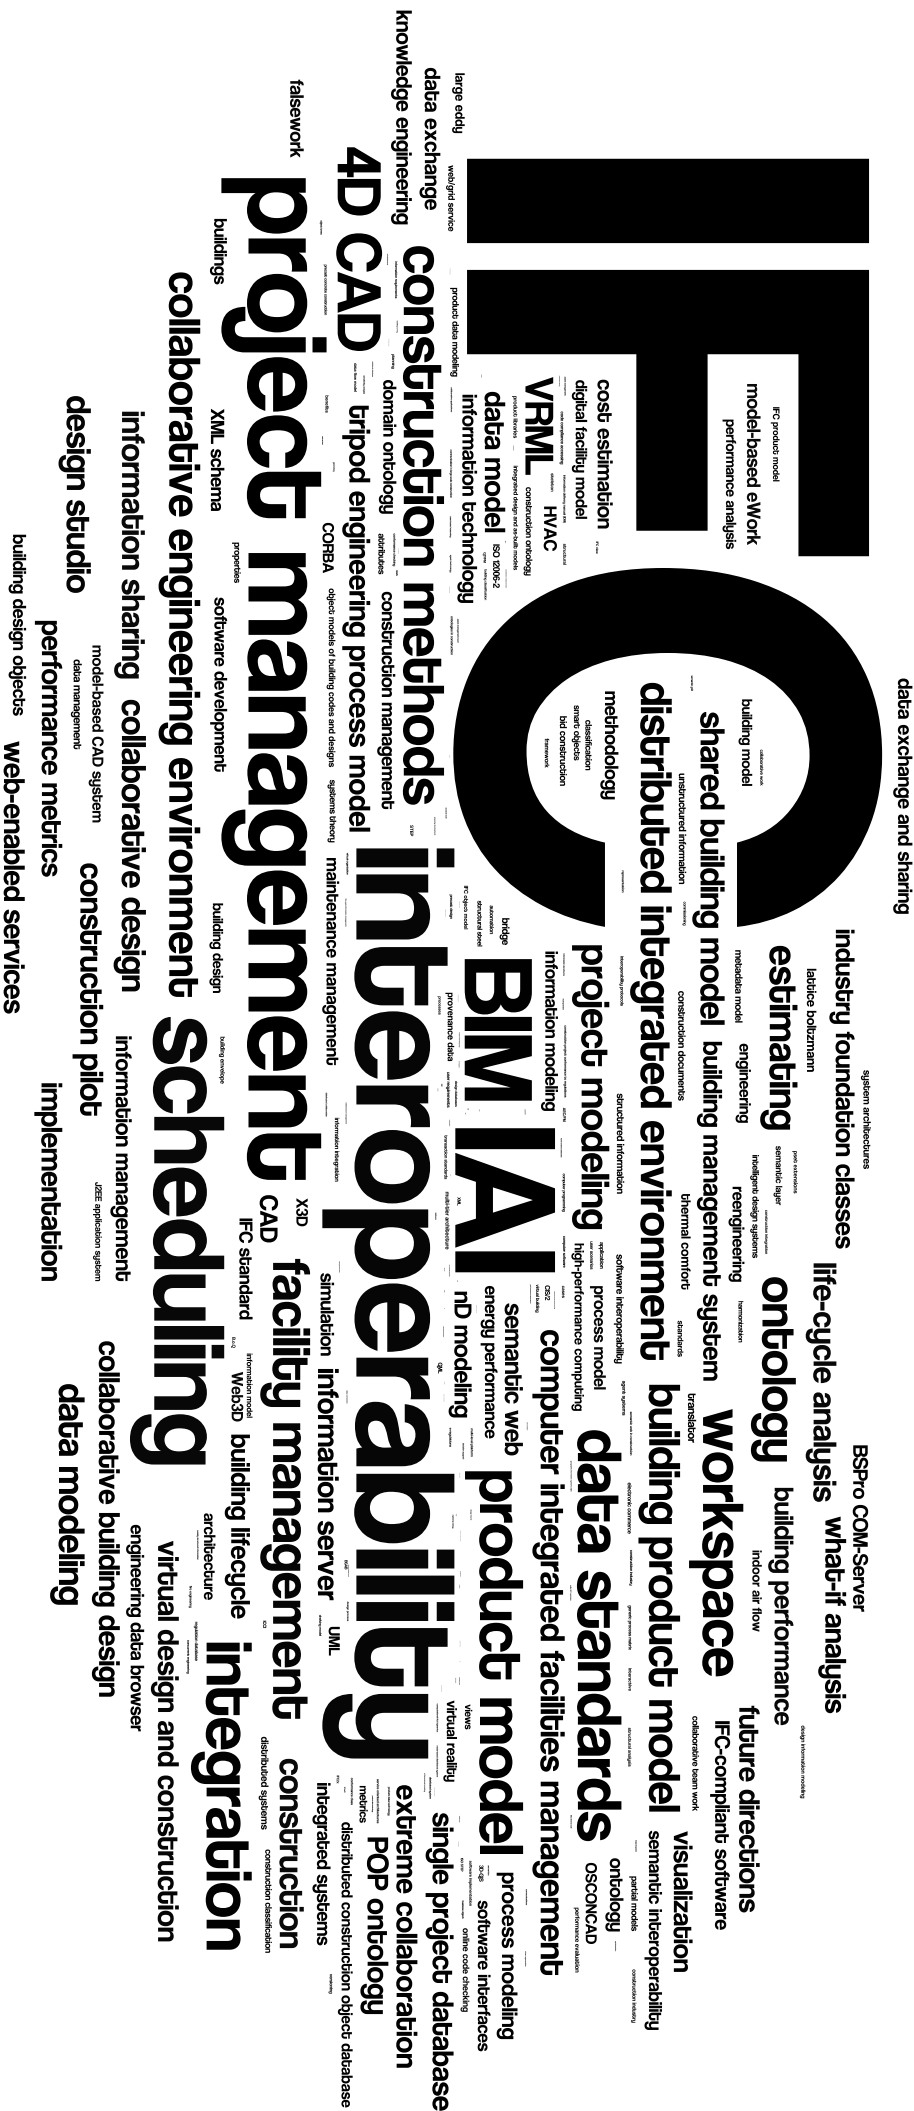

| Rank | Keyword                                   | Total Cites |
|------|-------------------------------------------|-------------|
| 1    | IFC                                       | 1535        |
| 2    | IAI                                       | 380         |
| 3    | interoperability                          | 370         |
| 4    | project management                        | 295         |
| 5    | scheduling                                | 264         |
| 6    | BIM                                       | 257         |
| 7    | integration                               | 171         |
| 8    | 4D CAD                                    | 164         |
| 9    | data standards                            | 164         |
| 10   | product model                             | 162         |
| 11   | construction methods                      | 152         |
| 12   | workspace                                 | 152         |
| 13   | facility management                       | 139         |
| 14   | ontology                                  | 126         |
| 15   | collaborative engineering environment     | 117         |
| 16   | distributed integrated environment        | 117         |
| 17   | building product model                    | 116         |
| 18   | VRML                                      | 106         |
| 19   | estimating                                | 105         |
| 20   | project modeling                          | 105         |
| 21   | data modeling                             | 96          |
| 22   | computer integrated facilities management | 91          |
| 23   | collaborative design                      | 90          |
| 24   | construction                              | 90          |
| 25   | design studio                             | 90          |
| 26   | shared building model                     | 90          |
| 27   | construction pilot                        | 86          |
| 28   | information sharing                       | 86          |
| 29   | life-cycle analysis                       | 86          |
| 30   | extreme collaboration                     | 79          |
| 31   | POP ontology                              | 79          |
| 32   | tripod engineering process model          | 79          |
| 33   | virtual design and construction           | 79          |
| 34   | collaborative building design             | 78          |
| 35   | implementation                            | 78          |
| 36   | information server                        | 78          |
| 37   | single project database                   | 78          |
| 38   | web-enabled services                      | 78          |
| 39   | what-if analysis                          | 78          |
| 40   | data model                                | 77          |
| 41   | future directions                         | 76          |
| 42   | performance metrics                       | 76          |
| 43   | building lifecycle                        | 71          |
| 44   | building management system                | 71          |
| 45   | building performance                      | 71          |
| 46   | industry foundation classes               | 71          |
| 47   | visualization                             | 71          |
| 48   | semantic web                              | 67          |
| 49   | CAD                                       | 66          |
| 50   | nD modeling                               | 64          |
| 51   | information management                    | 60          |
| 52   | data exchange                             | 59          |
| 53   | process modeling                          | 59          |
| 54   | knowledge engineering                     | 58          |
| 55   | cost estimation                           | 57          |
| 56   | BSPRO COM-Server                          | 55          |
| 57   | IFC-compliant software                    | 55          |
| 58   | information technology                    | 55          |
| 59   | data exchange and sharing                 | 54          |
| 60   | construction management                   | 50          |
| 61   | engineering data browser                  | 50          |
| 62   | falsework                                 | 50          |
| 63   | integrated systems                        | 50          |
| 64   | methodology                               | 50          |
| 65   | model-based eWork                         | 50          |
| 66   | ontology                                  | 50          |
| 67   | simulation                                | 50          |
| 68   | XML schema                                | 50          |
| 69   | building design objects                   | 49          |
| 70   | domain ontology                           | 49          |
| 71   | IFC standard                              | 49          |
| 72   | semantic interoperability                 | 49          |
| 73   | maintenance management                    | 48          |
| 74   | buildings                                 | 47          |
| 75   | energy performance                        | 47          |
| 76   | HVAC                                      | 47          |
| 77   | information modeling                      | 47          |

|     |                                             |    |
|-----|---------------------------------------------|----|
| 78  | software development                        | 47 |
| 79  | software interfaces                         | 47 |
| 80  | process model                               | 44 |
| 81  | reengineering                               | 44 |
| 82  | architecture                                | 43 |
| 83  | digital facility model                      | 43 |
| 84  | engineering                                 | 43 |
| 85  | Web3D                                       | 43 |
| 86  | X3D                                         | 43 |
| 87  | CORBA                                       | 42 |
| 88  | distributed construction object database    | 42 |
| 89  | model-based CAD system                      | 42 |
| 90  | OSCONCAD                                    | 42 |
| 91  | UML                                         | 42 |
| 92  | building design                             | 38 |
| 93  | building model                              | 38 |
| 94  | performance analysis                        | 38 |
| 95  | virtual reality                             | 38 |
| 96  | high-performance computing                  | 36 |
| 97  | indoor air flow                             | 36 |
| 98  | large eddy                                  | 36 |
| 99  | lattice boltzmann                           | 36 |
| 100 | thermal comfort                             | 36 |
| 101 | 4D                                          | 35 |
| 102 | data management                             | 30 |
| 103 | metrics                                     | 30 |
| 104 | translator                                  | 30 |
| 105 | distributed systems                         | 28 |
| 106 | system architectures                        | 28 |
| 107 | bridge                                      | 27 |
| 108 | construction documents                      | 27 |
| 109 | metadata model                              | 27 |
| 110 | software interoperability                   | 27 |
| 111 | structured information                      | 27 |
| 112 | unstructured information                    | 27 |
| 113 | views                                       | 27 |
| 114 | bid construction                            | 26 |
| 115 | IFC product model                           | 25 |
| 116 | J2EE application system                     | 25 |
| 117 | object models of building codes and designs | 25 |
| 118 | online code checking                        | 25 |
| 119 | provenance data                             | 25 |
| 120 | semantic layer                              | 25 |
| 121 | web/grid service                            | 25 |
| 122 | attributes                                  | 24 |
| 123 | classification                              | 24 |
| 124 | collaborative team work                     | 24 |
| 125 | construction classification                 | 24 |
| 126 | construction ontology                       | 24 |
| 127 | intelligent design systems                  | 24 |
| 128 | ISO 12006-2                                 | 24 |
| 129 | partial models                              | 24 |
| 130 | product data modeling                       | 24 |
| 131 | properties                                  | 24 |
| 132 | smart objects                               | 24 |
| 133 | systems theory                              | 24 |
| 134 | information model                           | 22 |
| 135 | standards                                   | 22 |
| 136 | CIS/2                                       | 18 |
| 137 | harmonization                               | 18 |
| 138 | structural steel                            | 18 |
| 139 | building envelope                           | 17 |
| 140 | framework                                   | 17 |
| 141 | information integration                     | 17 |
| 142 | integrated design and as-built models       | 17 |
| 143 | performance evaluation                      | 17 |
| 144 | design information modeling                 | 16 |
| 145 | IFC object model                            | 16 |
| 146 | multi-tier architecture                     | 16 |
| 147 | product libraries                           | 16 |
| 148 | pset extensions                             | 16 |
| 149 | 3D-GIS                                      | 15 |
| 150 | application                                 | 15 |
| 151 | automation                                  | 15 |
| 152 | construction industry                       | 15 |
| 153 | electronic commerce                         | 15 |
| 154 | GML                                         | 15 |
| 155 | agent systems                               | 14 |
| 156 | B.o.Q                                       | 13 |

|     |                                                 |    |
|-----|-------------------------------------------------|----|
| 157 | benefits                                        | 13 |
| 158 | cases                                           | 13 |
| 159 | interactive                                     | 13 |
| 160 | skeleton                                        | 13 |
| 161 | STEP                                            | 13 |
| 162 | structural                                      | 13 |
| 163 | structural analysis                             | 13 |
| 164 | code compliance accessing                       | 12 |
| 165 | collaborative work                              | 12 |
| 166 | generic process matrix                          | 12 |
| 167 | ICCI                                            | 12 |
| 168 | interoperability protocols                      | 12 |
| 169 | regulation database                             | 12 |
| 170 | transaction standards                           | 12 |
| 171 | user requirements                               | 12 |
| 172 | user scenarios                                  | 12 |
| 173 | versioning                                      | 12 |
| 174 | virtual building                                | 12 |
| 175 | XML                                             | 12 |
| 176 | AEC/FM                                          | 11 |
| 177 | construction integration                        | 11 |
| 178 | data flow model                                 | 11 |
| 179 | planning                                        | 11 |
| 180 | processes                                       | 11 |
| 181 | software implementation                         | 11 |
| 182 | BSAB                                            | 10 |
| 183 | commissioning                                   | 10 |
| 184 | computer programming                            | 10 |
| 185 | computer software                               | 10 |
| 186 | construction industry                           | 10 |
| 187 | precast concrete construction                   | 10 |
| 188 | precast design                                  | 10 |
| 189 | 2D                                              | 9  |
| 190 | building classification                         | 9  |
| 191 | concurrent engineering                          | 9  |
| 192 | conformance checking                            | 9  |
| 193 | conformance class                               | 9  |
| 194 | construction project conformance to regulations | 9  |
| 195 | design databases                                | 9  |
| 196 | drafting model                                  | 9  |
| 197 | e-regulations                                   | 9  |
| 198 | fire engineering                                | 9  |
| 199 | GTPPM                                           | 9  |
| 200 | IFC view                                        | 9  |
| 201 | IFC2x                                           | 9  |
| 202 | information delivery manual (IDM)               | 9  |
| 203 | information requirements                        | 9  |
| 204 | ISO STEP                                        | 9  |
| 205 | multi-level platform                            | 9  |
| 206 | ontologies in construction                      | 9  |
| 207 | representation                                  | 9  |
| 208 | semantic web in construction                    | 9  |
| 209 | service oriented architectures                  | 9  |
| 210 | design process                                  | 8  |
| 211 | business object                                 | 7  |
| 212 | communication in large-scale construction       | 7  |
| 213 | distributed system                              | 7  |
| 214 | object trees                                    | 7  |
| 215 | product data technology                         | 7  |
| 216 | semantic grid                                   | 7  |
| 217 | virtual organization                            | 7  |
| 218 | 3D                                              | 6  |
| 219 | agent technology                                | 6  |
| 220 | asset management                                | 6  |
| 221 | asset management tool                           | 6  |
| 222 | case-based reasoning                            | 6  |
| 223 | collaborative applications                      | 6  |
| 224 | communications                                  | 6  |
| 225 | computational fluid dynamics                    | 6  |
| 226 | DBMS                                            | 6  |
| 227 | decision support                                | 6  |
| 228 | distributed collaboration                       | 6  |
| 229 | geometry                                        | 6  |
| 230 | information structures                          | 6  |
| 231 | mode-based distributed system                   | 6  |
| 232 | semantics                                       | 6  |
| 233 | sensitivity analysis                            | 6  |
| 234 | weakly structured information                   | 6  |

|     |                                         |   |
|-----|-----------------------------------------|---|
| 235 | building survey                         | 5 |
| 236 | data conversion                         | 5 |
| 237 | design intent                           | 5 |
| 238 | geographic information systems (GIS)    | 5 |
| 239 | life-cycle information management       | 5 |
| 240 | maintenance management                  | 5 |
| 241 | n-Dimensional modeling                  | 5 |
| 242 | optimization                            | 5 |
| 243 | performance assurance                   | 5 |
| 244 | property development                    | 5 |
| 245 | refurbishment                           | 5 |
| 246 | relational database                     | 5 |
| 247 | solibri IFC optimizer                   | 5 |
| 248 | urban regeneration                      | 5 |
| 249 | design integration                      | 4 |
| 250 | EJB                                     | 4 |
| 251 | engineering ontology                    | 4 |
| 252 | finite element model                    | 4 |
| 253 | human-centered collaboration            | 4 |
| 254 | ISTforCE                                | 4 |
| 255 | middleware                              | 4 |
| 256 | model generation                        | 4 |
| 257 | product data technology                 | 4 |
| 258 | structural model                        | 4 |
| 259 | web services                            | 4 |
| 260 | automated deduction                     | 3 |
| 261 | building code                           | 3 |
| 262 | computer-aided building design          | 3 |
| 263 | construction industry                   | 3 |
| 264 | conventional interaction                | 3 |
| 265 | data translation                        | 3 |
| 266 | e-interaction                           | 3 |
| 267 | emergency exit                          | 3 |
| 268 | fire response                           | 3 |
| 269 | geospatial                              | 3 |
| 270 | GIS                                     | 3 |
| 271 | reinforced-concrete structural model    | 3 |
| 272 | ST-2                                    | 3 |
| 273 | standardization of building information | 3 |
| 274 | structural design domain                | 3 |
| 275 | topological information                 | 3 |
| 276 | A/E/C design education                  | 2 |
| 277 | advanced meeting rooms                  | 2 |
| 278 | augmented reality                       | 2 |
| 279 | case-based teaching                     | 2 |
| 280 | computer-aided instruction              | 2 |
| 281 | construction project                    | 2 |
| 282 | design detailing                        | 2 |
| 283 | design systems                          | 2 |
| 284 | design tutoring system                  | 2 |
| 285 | fielibus                                | 2 |
| 286 | goal based scenario                     | 2 |
| 287 | IFC data standard                       | 2 |
| 288 | IFC visualization                       | 2 |
| 289 | information exchange and sharing        | 2 |
| 290 | Internet                                | 2 |
| 291 | knowledge integration                   | 2 |
| 292 | models                                  | 2 |
| 293 | ubiquitous computing                    | 2 |
| 294 | CDF                                     | 1 |
| 295 | computer integrated construction        | 1 |
| 296 | generic object classes                  | 1 |
| 297 | grid computing                          | 1 |
| 298 | integrated project management           | 1 |
| 299 | integrated simulation                   | 1 |
| 300 | ISO                                     | 1 |
| 301 | modularity                              | 1 |
| 302 | product and process modeling            | 1 |
| 303 | scalability                             | 1 |
| 304 | terminology                             | 1 |
| 305 | urban system                            | 1 |
| 306 | urban-scale hazard                      | 1 |
| 307 | virtual organization                    | 1 |
